# Supplementary material
Source: MDPI journal article supplement (https://www.mdpi.com/2673-4591/6/1/61)
Supplement: s1 [file s1]

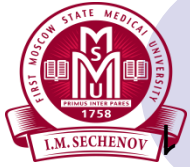

<sup>1</sup>I.M. Sechenov First Moscow State  
Medical University

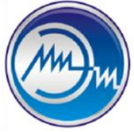

**MIET** <sup>2</sup>National Research University  
of Electronic Technology

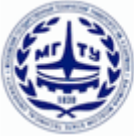

**BMSTU** <sup>3</sup>Bauman Moscow State  
Technical University

## **Noninvasive Detection Magnetic Particles in Biological Objects**

Levan Ichkitidze,<sup>1,2</sup> Michail Belodedov,<sup>3</sup>  
Alexandr Gerasimenko,<sup>1,2</sup> Dmitry Telyshev,<sup>1,2</sup>  
Sergey Selishchev<sup>2</sup>

**I3S**  
2021

**8<sup>th</sup> International Symposium  
on Sensor Science**

17–28 May 2021, ONLINE

# Background



- Numerous modern nanomaterials contain magnetic particles of micron, submicron and nano sizes. In this regard, a special place is occupied by carbon nanotubes (CNTs) and nanomaterials based on them. In particular, CNTs can include catalytic iron particles, as well as other magnetic particles encapsulated therein. For example, 3-D composite BSA/CNT nanomaterials containing bovine serum albumin (BSA, matrix) and CNT (filler) or their aqueous suspensions are promising as various bioresorbable bone implants, or as bioavail for laser welding of biological tissues [1].

[1] Gerasimenko A.Yu., Ichkitidze L.P., Podgaetsky V.M., Selishchev S.V. / Biomedical applications of promising nanomaterials with carbon nanotubes // Biomedical Engineering, 2015. Vol.48. No6, March. PP. 310-314. DOI: 10.1007/s10527-015-9476-z

# Application of magnetic particles in molecular biological studies: example 1

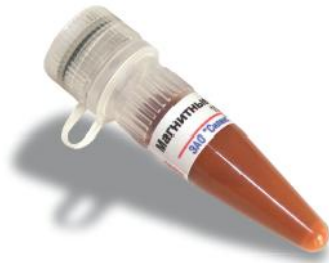

## Some magnetic particles:

- MP-SiO<sub>2</sub> (for the isolation of nucleic acids)
- MP-NH<sub>2</sub> (for sewing proteins or spacers with the corresponding functional group)
- MP-streptavidin (for the capture of biotinylated products)
- MP-COOH (for sewing proteins, nucleotide probes or spacers with the corresponding functional group)
- MP-oligo (d) T (for isolation of poly (A) mRNA)
- MP-protein A and MP-protein G (for isolation of antibodies, immune complexes, cells)

## Description and properties of magnetic particles SileksMagX-Glyoxal

**Basis:** Iron oxide encapsulated in an inert envelope

**Type of magnetization:** Superparamagnet (no residual magnetization)

**Particle shape:** Sphere

**Size:** 400-600 nm

**Concentration:** 5 mg/ml

**Particle capacity:** 500 µg BSA per 1 ml particles - high activation rate

**Storage buffer:** water

**Storage conditions:** +4 °C, do not freeze

## Long-term storage of nucleic acids in the *FinalWash* buffer

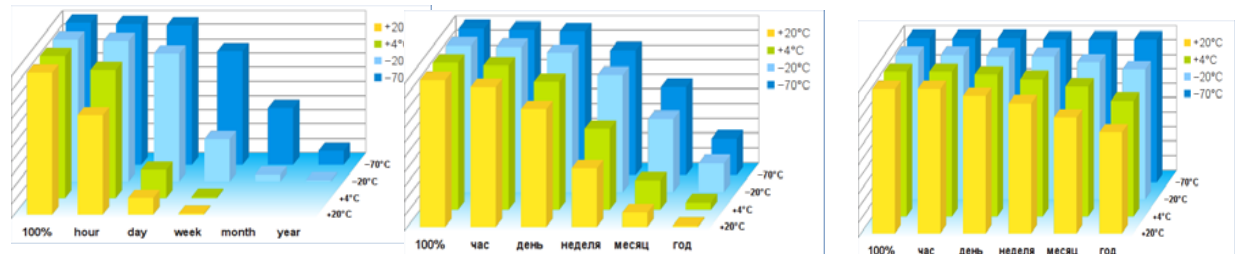

|              |                                   |                                                                        |
|--------------|-----------------------------------|------------------------------------------------------------------------|
| Water MilliQ | Water with addition <i>RNasin</i> | In a coupled form on magnetic particles in the buffer <i>FinalWash</i> |
|--------------|-----------------------------------|------------------------------------------------------------------------|

# Magnetic Particle Imaging

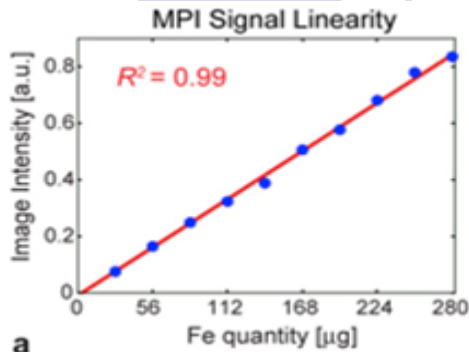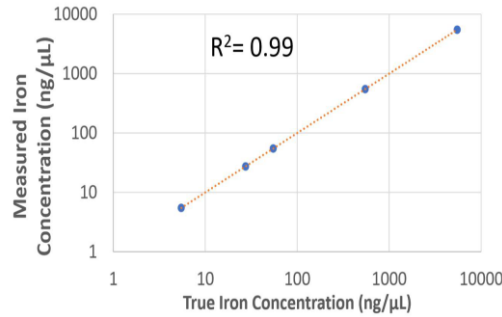

Carotid Phantom no Stenosis

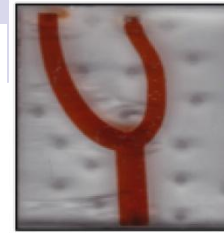

MPI image

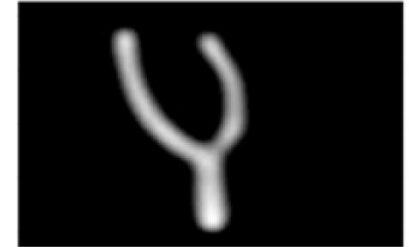

Carotid Phantom with Stenosis

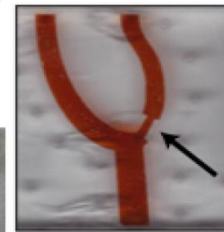

MPI image depicting stenosis

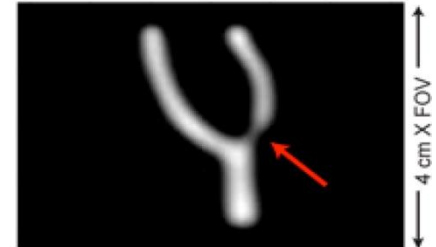

a

Photograph

MPI

Photograph/MPI

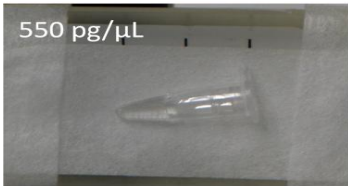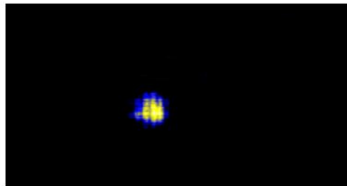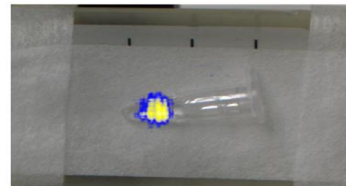

a

b

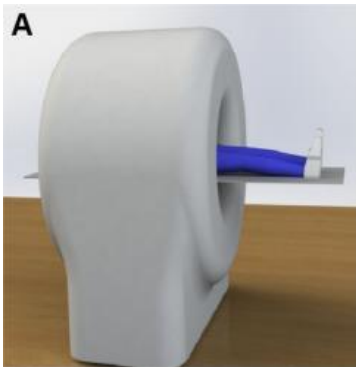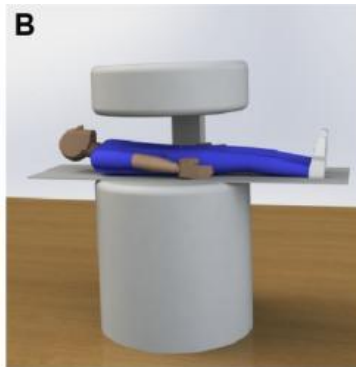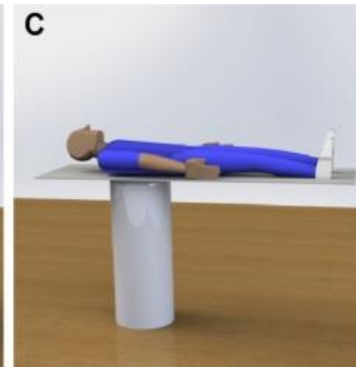

The magnetization signal in the 600 mT field with MPI is more than ten million greater than the magnetization signal in the 7 T field with MRI.

[E.U. Saritas, P.W. Goodwill, L.R. Croft, et al. // J Magn Reson. 2013 Apr; 229: 116–126.](#)

Concept of the three main scanner geometries

# Methods and instruments

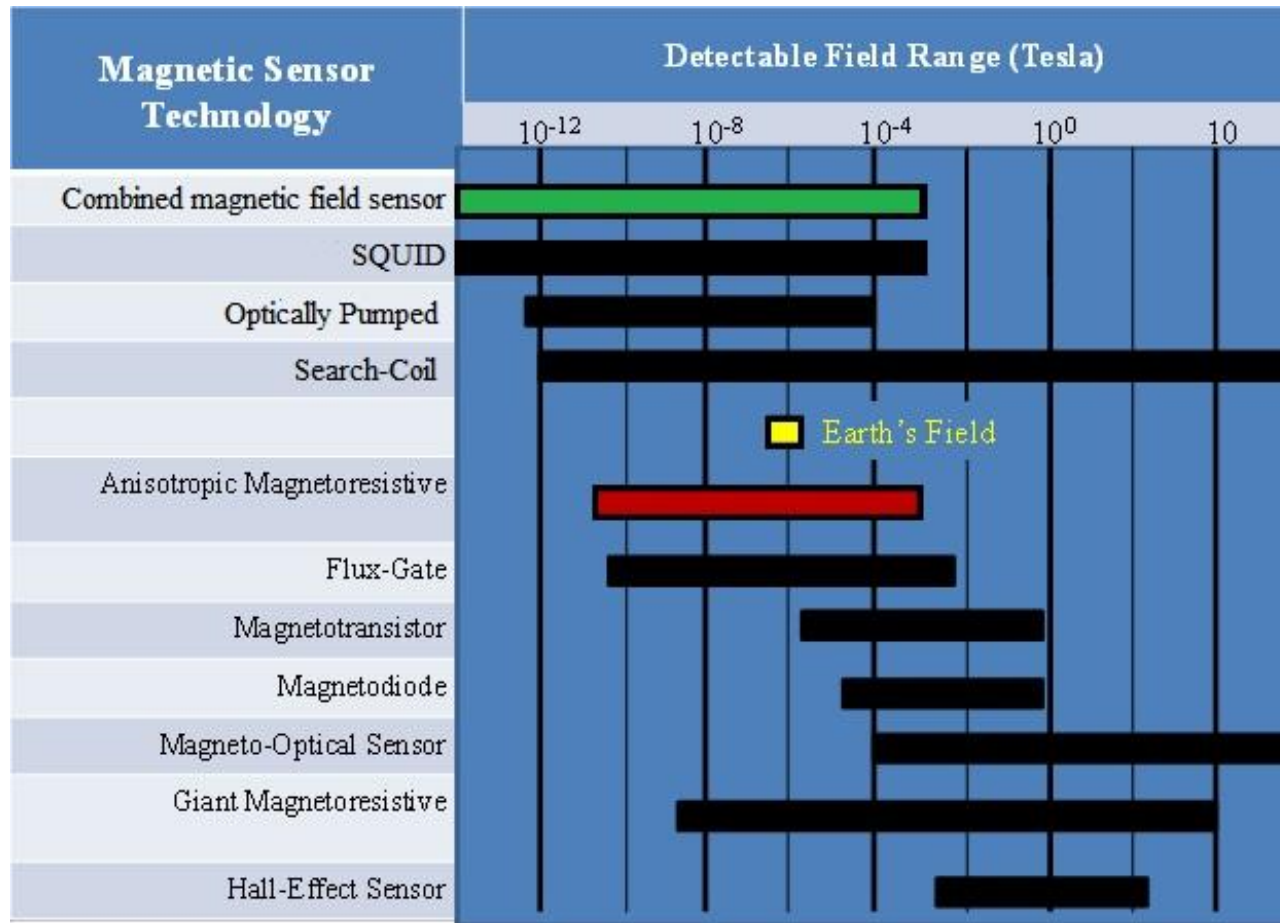

# Methods and instruments: SQUIDs, CMFS and NS CMFS

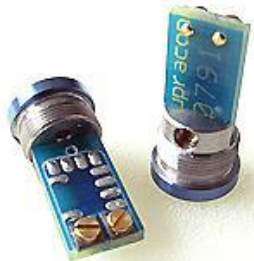

SQUID

$$\Delta B \sim 3 \text{ fT/Hz}^{1/2}$$

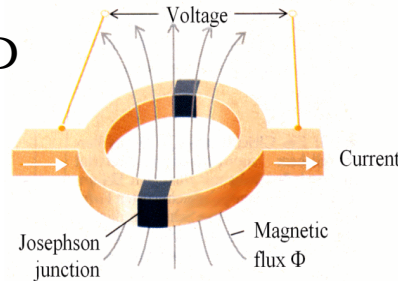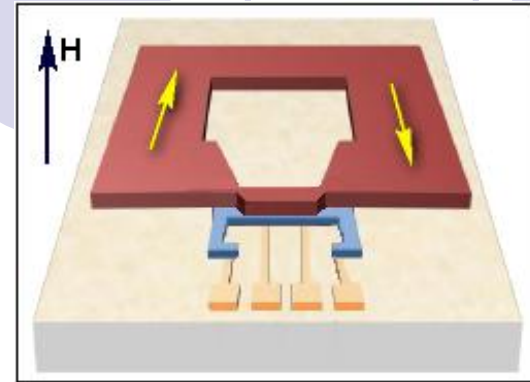

CMFS

## Magma EFI HiRes

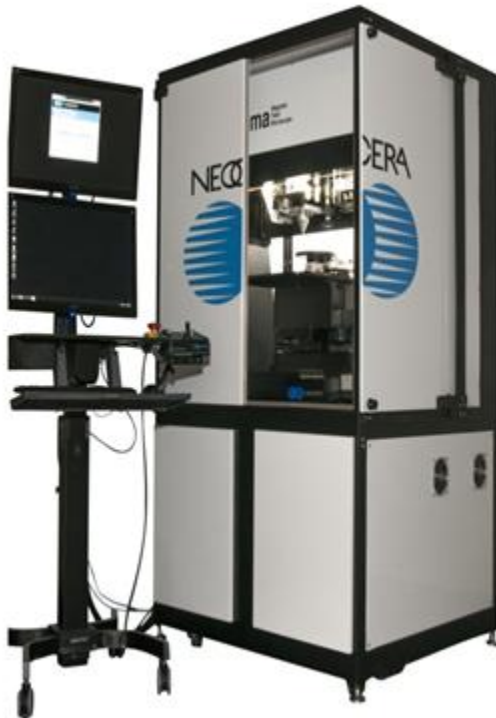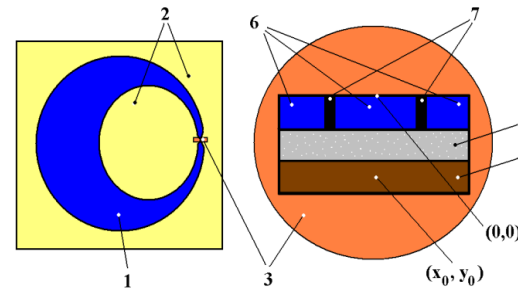

NS CMFS

### Full Capabilities

- Magma EFI HiRes Microscope addresses all static defects: shorts, leakages, and opens.
- Package shorts are a natural fit for SQUID in Magma microscopes since magnetic fields permeate all materials, e.g. power and ground planes, silicon, molding compounds, etc.
- Die shorts are located using the HiRes sensor with better than 500 nm spatial resolution. Magnetic field resolution is not limited by wavelength, but only by sensor size and scanning distance.
- Open failures are found using a space domain reflectometry (SDR) technique that applies a high frequency signal (20MHz to 200MHz) while detecting the RF magnetic field generated by the current. Using this technique on SOC packages with stacked die, TSVs and interposers, open failures in the silicon devices can be localized.

<http://neocera.com/products/magma-efi-hires/>

# Methods and instruments: Parameters SQUIDs, CMFSs and NS CMFS

| Parameter/Type                           | SQUID<br>Msgreen [1]       | SQUID<br>Cryo M1000 [2] | CMFS [3]<br>(NS CMFS [4]) |
|------------------------------------------|----------------------------|-------------------------|---------------------------|
| Sensitivity, $\text{fT}/\text{Hz}^{1/2}$ | 3.5                        | 100                     | 3.2 (0.8)                 |
| Number of projections                    | 1                          | 1                       | 1                         |
| Size, mm                                 | 7.5x7.5                    | 8x8                     | 10x10<br>(2x2)            |
| Material                                 | Nb-Al-AlO <sub>x</sub> -Nb | YBCO                    | Nb-GMR                    |
| Country                                  | Germany                    | USA                     | France<br>(Russia)        |

1. [supracon.com](http://supracon.com)
2. [starcryo.com](http://starcryo.com)
3. Pannetier M., Fermon C., Le Goff G., et al. Ultra-sensitive field sensors – an alternative to SQUIDs // IEEE Trans. Appl. Supercond., **15** (2), 892– 895 (2005)
4. Ichkitidze L.P., Mironyuk A.N. Topological nanostructured film superconducting flux transformer // Journal of Nano and Microsystem Technique, **1**, 47-50 (2012).

# Aim

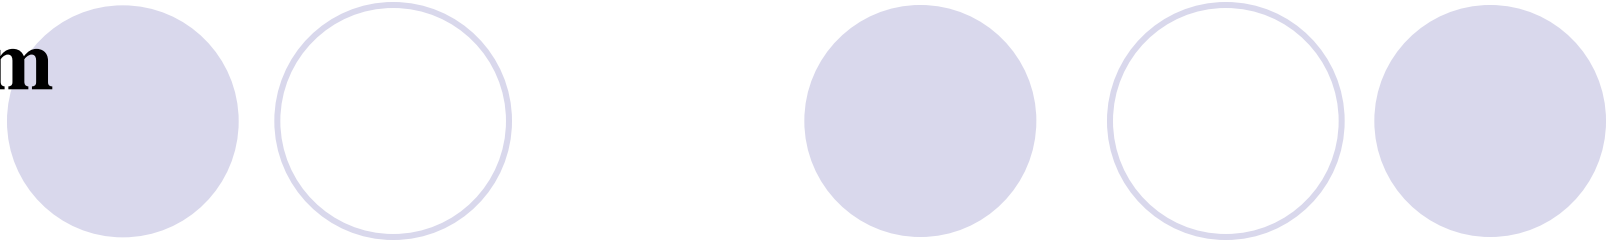

- We estimated the distance between a magnetic field sensor ( MFS) and magnetic particles (MPs) at which the magnetic field perturbations caused by MPs can be detected at different values of other parameters.



# Results

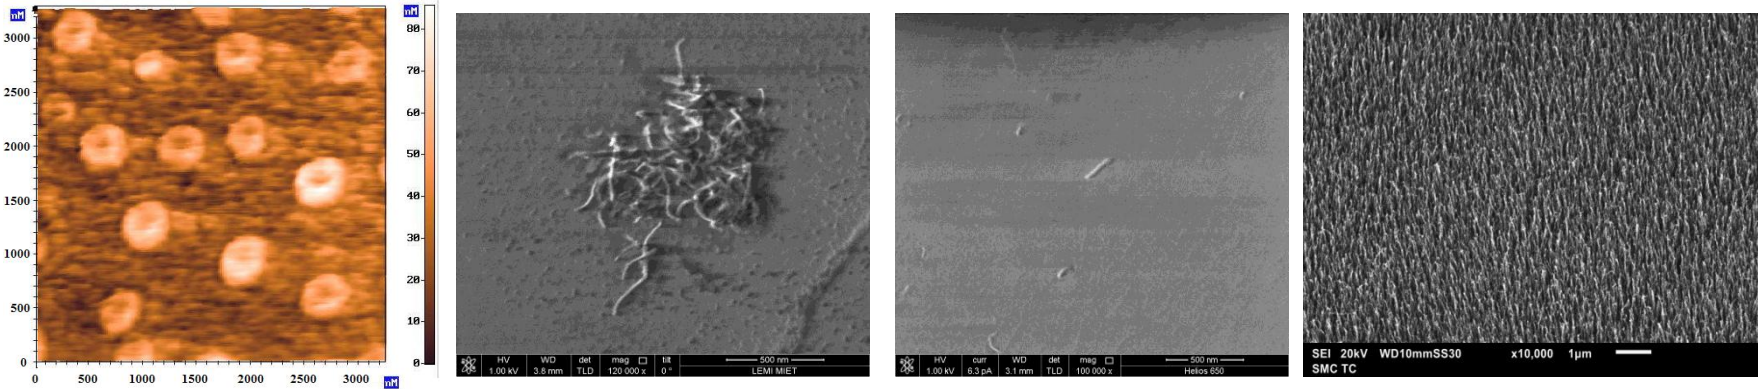

a

b

c

d

Surfaces of composite nanomaterials BSA /MWCNT: (a) - picture in tunnel force microscope; (b) - pictures in a scanning electron microscope (clusters of MWCNT). There are: (c) – MWCNT; (d) - forest of SWCNT

# Detecting of magnetic particles in biological systems

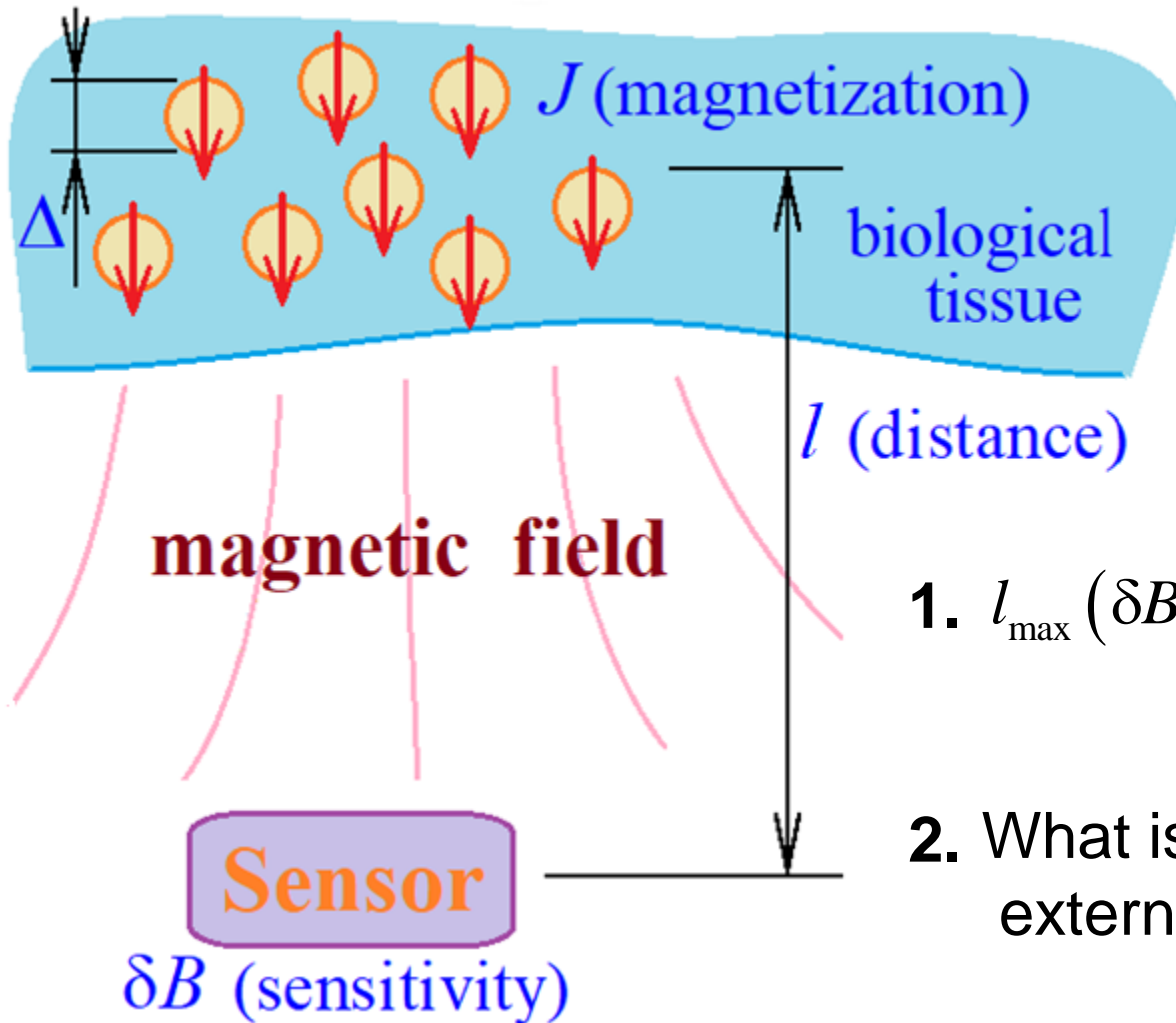

The questions to investigate:

1.  $l_{\max}(\delta B, J, \Delta, n) = ?$   
( $n$  – concentration)
2. What is the effect of external magnetic field?

# Magnetic field of a magnetized particles

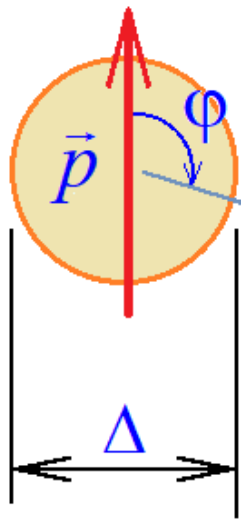

$\vec{p} [A \times m^2]$  – magnetic moment of a particle

$$|\vec{p}| = p = JV = J \frac{\pi \Delta^3}{3}$$

$J [A/m]$  – magnetization of a particle

## Magnetic field of a single particle:

$$|\vec{B}| = \frac{\mu_0}{4\pi} \times \frac{\vec{p}}{r^3} \sqrt{1 + \cos^2 \varphi}$$

$$\frac{\mu_0}{24} \times \frac{J \Delta^3}{r^3} \leq |\vec{B}| \leq \frac{\mu_0}{12} \times \frac{J \Delta^3}{r^3}$$

# Magnetic field of the particles systems

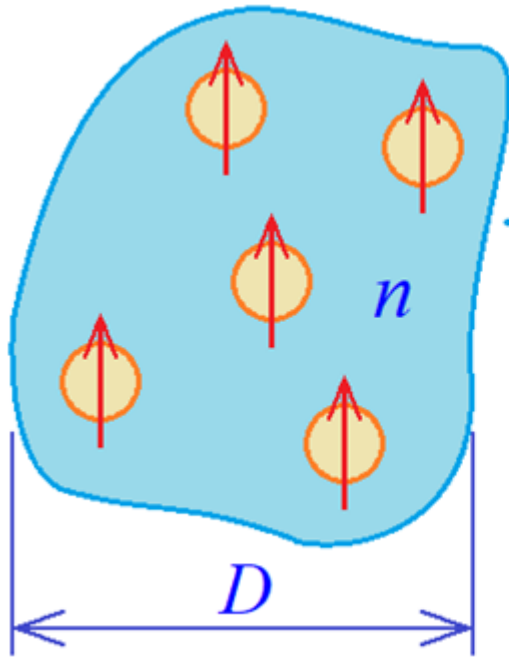

$n$  – concentration  
of the particles

Magnetic field of the particles system:

$$B_{\text{total}} = \sum_i^V \vec{B}_i \approx \sum_i^V |\vec{B}_i| = n \frac{\pi D^3}{6} \langle B_i \rangle \geq$$

$$\geq n \frac{\pi D^3}{6} \times \frac{\mu_0}{24} \times \frac{J \Delta^3}{l^3} = \frac{n \pi \mu_0 J}{144} \left( \frac{D \Delta}{l} \right)^3$$

---


$$B_{\text{total}} \approx 27.4 \times 10^{-9} J n \left( \frac{D \Delta}{l} \right)^3 \quad (\text{in the units of SI})$$

# Distance evaluation for normal condition

$$B_{\text{total}} \approx 27.4 \times 10^{-9} Jn \left( \frac{D\Delta}{l} \right)^3 \Rightarrow l_{\text{max}} \approx 0.00302 \times D\Delta \sqrt[3]{\frac{Jn}{\delta B}}$$

$l_{\text{max}}$  – maximum sensor to  
object distance

( in the units of SI )

$\delta B$  – sensitivity of the sensor

Estimates of the  $l_{\text{max}}$  for parameters typical values:

$J = 120\,000 \text{ A/m}$  ( $\mu$  of the particles = 3000,  
external field = 50  $\mu\text{T}$ )

$n = 8 \times 10^{12} \text{ m}^{-3}$  (linear density of the  
particles = 20  $\text{mm}^{-1}$ )

$\Delta = 10^{-6} \text{ m}$  (= 1  $\mu\text{m}$ )

$D = 10^{-3} \text{ m}$  (= 1  $\text{mm}$ )

$\delta B = 10^{-12} \text{ T}$  (= 1  $\text{pT}$ )

$$l_{\text{max}} = 3 \text{ cm}$$

$$l_{\text{max}} \sim \sqrt[3]{J}$$

$$J \sim B_{\text{ext}} \mu$$

# Results

- The measured values of the sizes of iron particles (FIG. 1) and the concentration of magnetite particles (FIG. 2) recorded by different magnetic field sensors

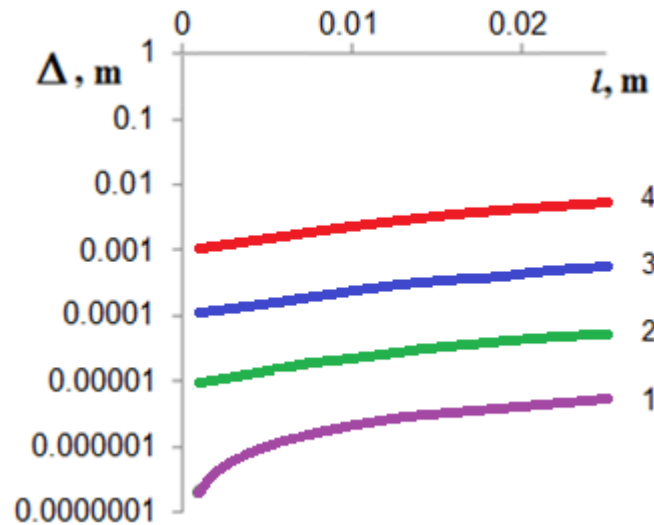

Fig.1. The dependence  $D(l)$  is the minimum size of the iron particle,  $l$  is the distance from the magnetometer to the iron particle) for different sensitivity  $\delta B$  of the magnetometers:

- 1 – 1 fT, (SQUID), (NS CMFS)
- 2 – 1 pT, (NMR LP)
- 3 – 1 nT, (GMR)
- 4 – 1  $\mu$ T (Hall)

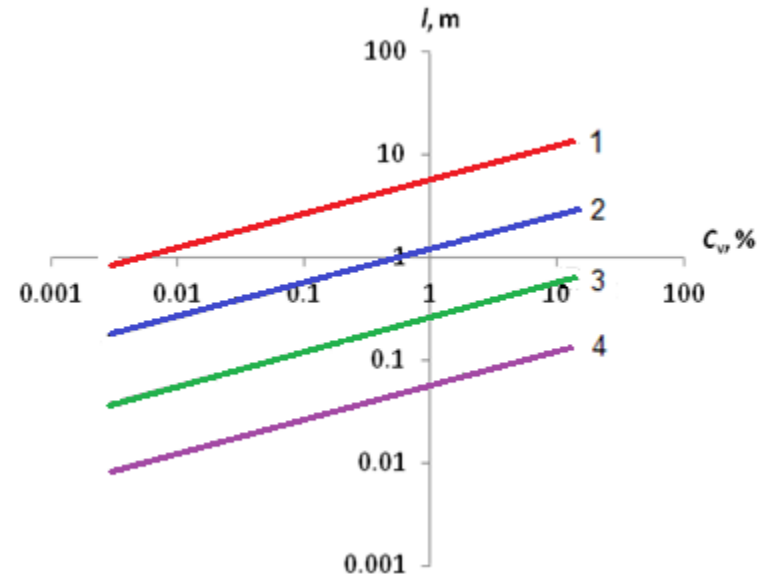

Fig. 2. dependence  $l(C_v)$  at  $D = 50$  nm,  $\Delta = 1$  mm,  $J^* \sim 50$  A·m<sup>2</sup>/kg,  $\rho \sim 5 \cdot 10^3$  kg/m<sup>3</sup>, and a value of  $\delta B$ :

- 1 – 10 fT,
- 2 – 1 pT,
- 3 – 100 pT,
- 4 – 10 nT

# Conclusions

- in a volume of  $1 \text{ mm}^3$ , paramagnetic particles with a size of  $1 \text{ }\mu\text{m}$  and a concentration of  $10^{14} \text{ m}^{-3}$  at a distance of about 3 cm from a magnetic field sensor with a resolution of less than 10 fT can be detected. It is believed that the particles are in the Earth's magnetic field;
- a single iron particle with a size of a few micrometers over a distance of 1 cm with a magnetic field sensor with a resolution of the order (or less than) 10 fT can be registered;
- magnetite nanoparticles with a volume concentration of the order of nanopercent per 1 cm distance by a magnetic field sensor having a resolution of the order of 10 fT can be identified.

Thank you for your attention!
